# Supplementary material for: Stimuli-responsive controlled release and molecular transport from hierarchical hollow silica/polyelectrolyte multilayer formulations
Source: Royal Society of Chemistry journal article supplement (doi:10.1039/c4tb01216j), 2014-08-20
Supplement: c4tb01216j1.pdf [file c4tb01216j1.pdf]

## Supporting Information

# Stimuli-Responsive Controlled Release and Molecular Transport from Hierarchical Hollow Silica/Polyelectrolyte Multilayer Formulations

Shunsheng Cao<sup>\*a,b</sup>, Ying Zhang,<sup>a</sup> Lulu Zhou,<sup>b</sup> Juanrong Chen,<sup>b</sup> Long Fang,<sup>a</sup> Dan Fei,<sup>c</sup> Huijun Zhu,<sup>b</sup> and Yi Ge<sup>\*b</sup>

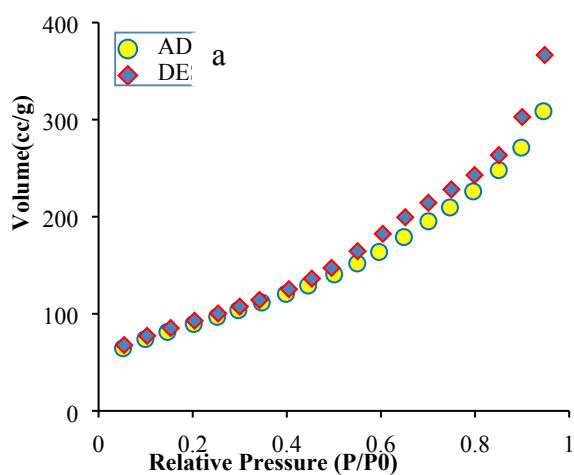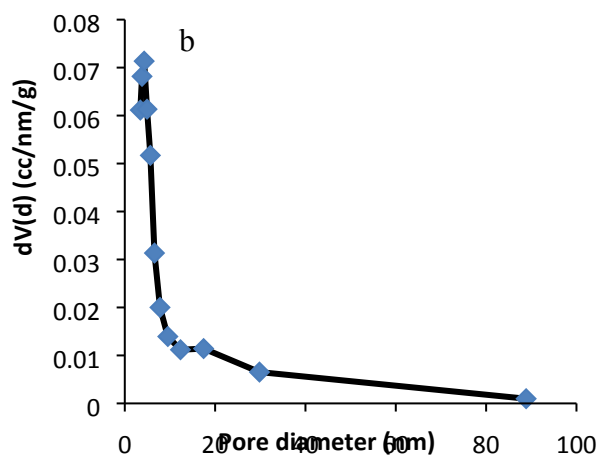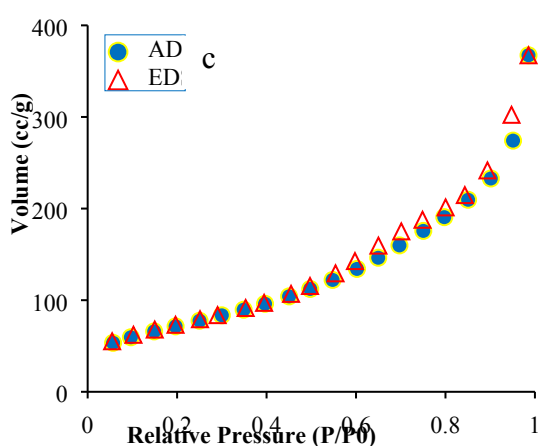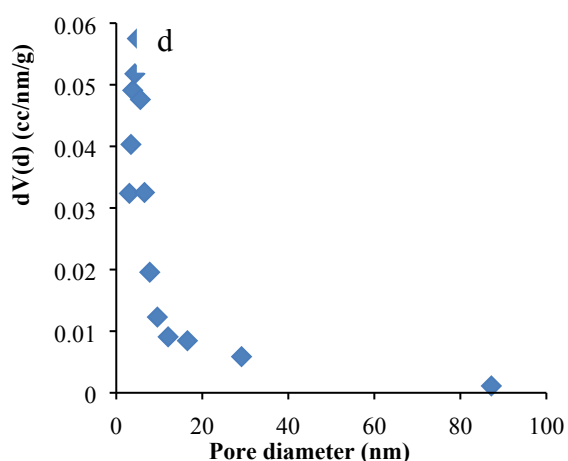

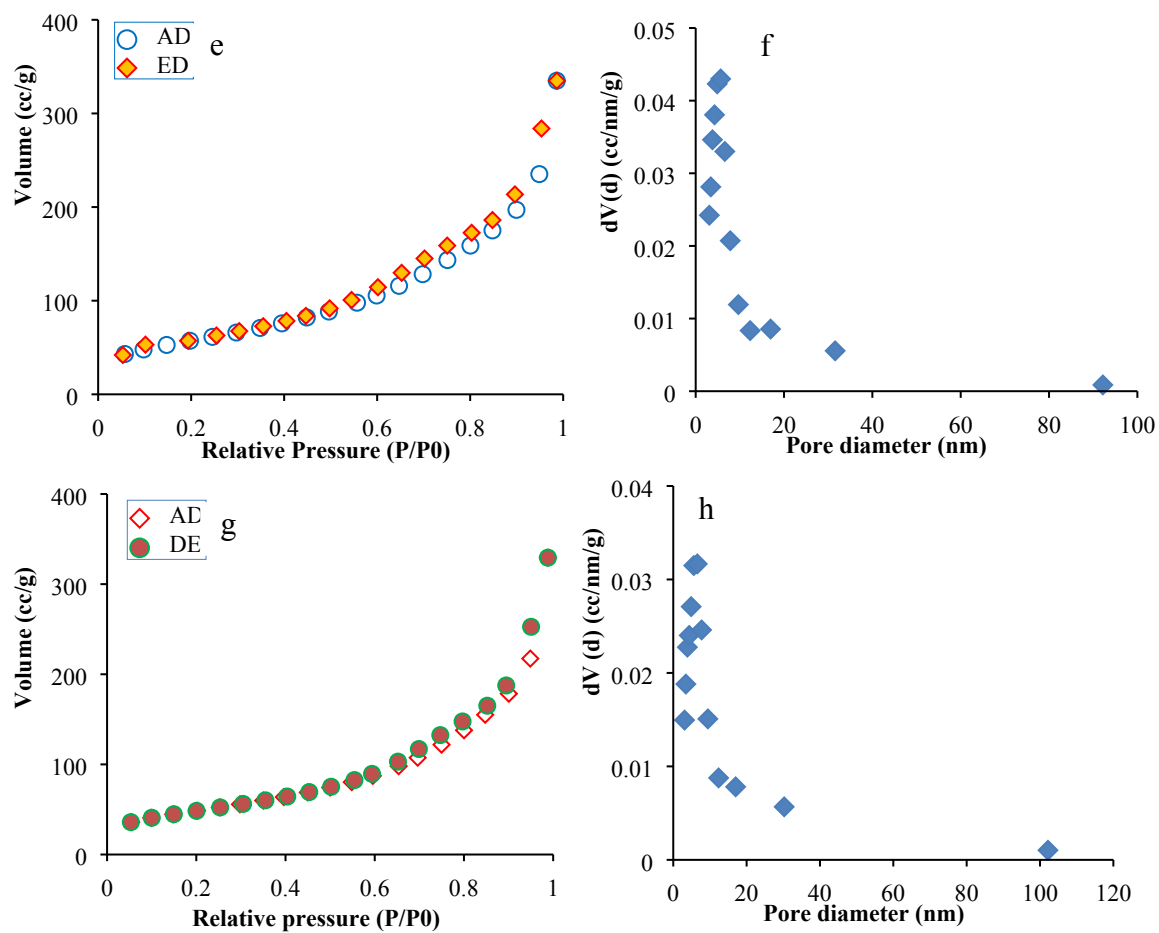

**Fig. S1** BET and BJH data of HHS/PEM (a: two layers; b: four layers; c: six layers and d: eight layers)
